# Supplementary material for: Dynamics and structural changes of calmodulin upon interaction with the antagonist calmidazolium
Source: PubMed Central journal article supplement (PMC9361521; doi:10.1186/s12915-022-01381-5), 2022-08-09
Supplement: 12915_2022_1381_MOESM1_ESM.pdf [file 12915_2022_1381_MOESM1_ESM.pdf]

1 **Dynamics and structural changes of calmodulin upon interaction with the antagonist**  
2 **calmidazolium**

3

4 **Combined Additional Files 1: Figures S1-S12 – Table S1-S6**

5

6 **FigS1** - Synchrotron radiation far-UV circular dichroism. **FigS2** - Isothermal titration calorimetry of  
7 Holo-CaM:CDZ. **FigS3** - Analysis of Holo-CaM using SAXS. **TableS1** - SAXS data collection and  
8 scattering derived parameters. **TableS2** - Crystallographic data collection and refinement statistics. **FigS4**  
9 - Difference electron density map. **FigS5** - Interactions between CDZ and Holo-CaM residues visualized  
10 using Ligplot+. **TableS3** - Detailed location of residues interacting with CDZ according to Ligplot+ and  
11 comparison with HDX-MS data. **TableS4** - HDX-MS data summary. **FigS6** - Peptide map of CaM by  
12 HDX-MS. **FigS7** - Deuterium uptake plots. **FigS8** - Comparison of the differential HDX patterns within  
13 Holo-CaM upon H-helix (A), P454 (B), MLCK (C) and CDZ (D) binding. **TableS5** - Rotational  
14 correlation time ( $\tau_c$ ) of Holo-CaM at different Holo-CaM:CDZ ratios. **TableS6** - Comparison of  
15 secondary structure content from SRCD, NMR and X-ray. **FigS9** - Order parameter ( $S^2$ ) reflecting the  
16 amplitude of motions on the ns-ps time scales of free Holo-CaM. **FigS10** - Holo-CaM internal dynamics  
17 from  $^{15}\text{N}$  relaxation data. **FigS11** - Comparison of Holo-CaM internal dynamics from  $^{15}\text{N}$  relaxation  
18 data in complex with CDZ. **FigS12** - Statistical analysis performed with MEMHDX.

19

20

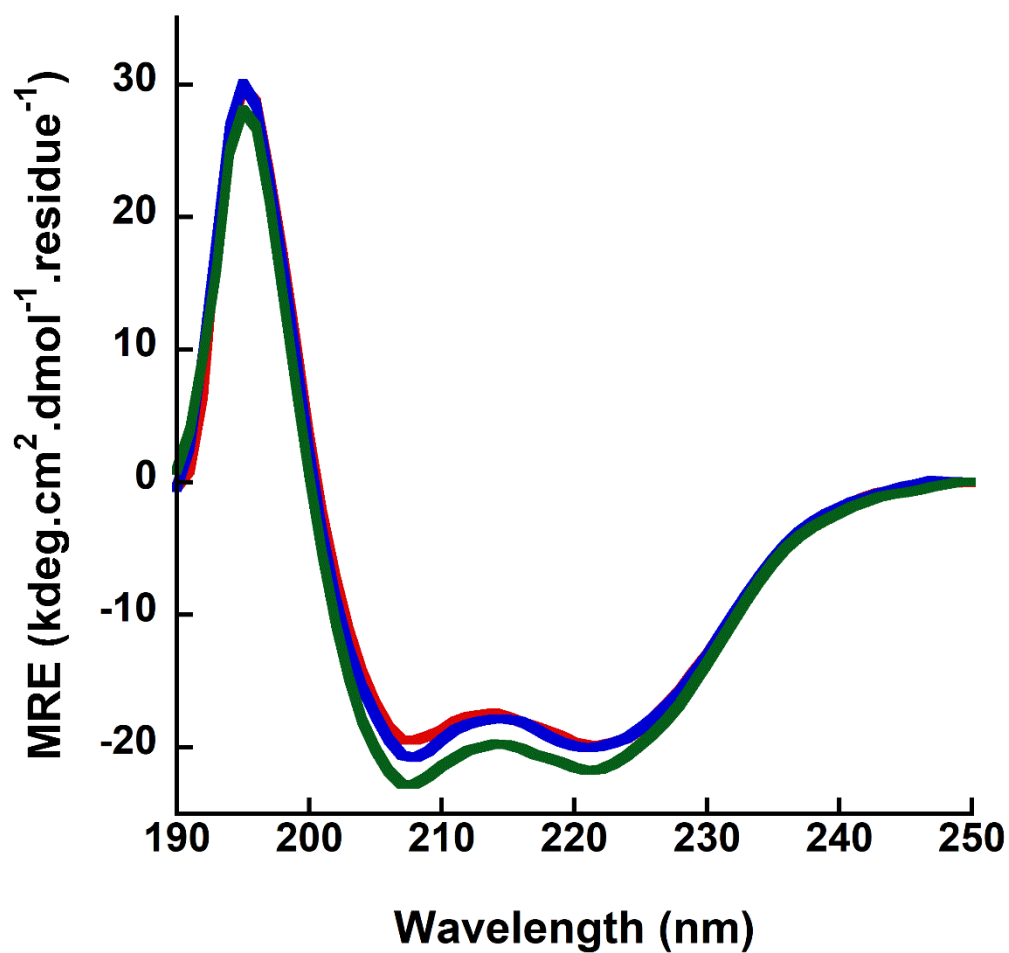

22  
23  
24  
25  
26  
27

**Figure S1: Synchrotron radiation far-UV circular dichroism.** Holo-CaM (60  $\mu\text{M}$ ) in buffer B with 0.91% final DMSO in the absence (red) and in the presence of 66  $\mu\text{M}$  of CDZ (blue, Holo-CaM:CDZ molar ratio of 1:1.1) or 132  $\mu\text{M}$  of CDZ (green, Holo-CaM:CDZ molar ratio of 1:2.2).

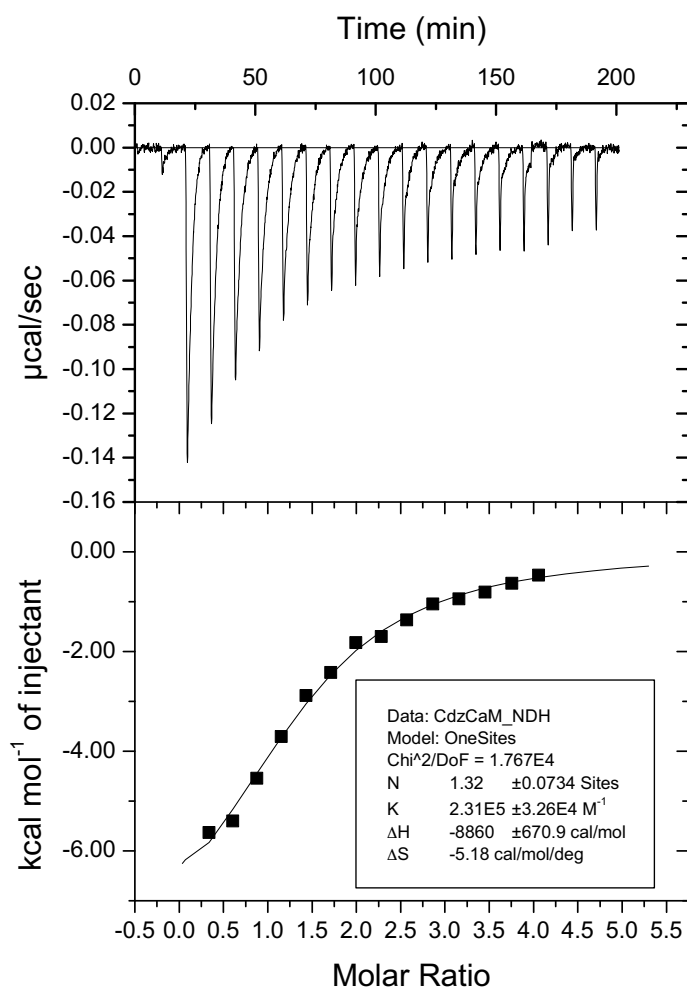

29  
 30  
 31  
 32  
 33  
 34  
 35  
 36  
 37  
 38  
 39

**Figure S2: Isothermal titration calorimetry of Holo-CaM:CDZ.** A solution of 8  $\mu\text{M}$  Holo-CaM was loaded in the reaction cell. A solution of 200  $\mu\text{M}$  CDZ was loaded into the syringe and then injected into the reaction cell. Heats of dilutions were measured by injecting 200  $\mu\text{M}$  of CDZ into buffer B and were subtracted from the heat of reaction of the Holo-CaM titration by CDZ. The titration profiles were analyzed using the Origin7.0 software (OriginLab) to determine the thermodynamic parameters. In the example shown in this figure, the dissociation constant,  $K_D$ , is 4.3  $\mu\text{M}$  and the stoichiometry is 1.3. The average values of  $K_D$  and stoichiometry ( $n=6$  experiments) are  $3 \pm 2 \mu\text{M}$  and  $1.2 \pm 0.5$ , respectively.

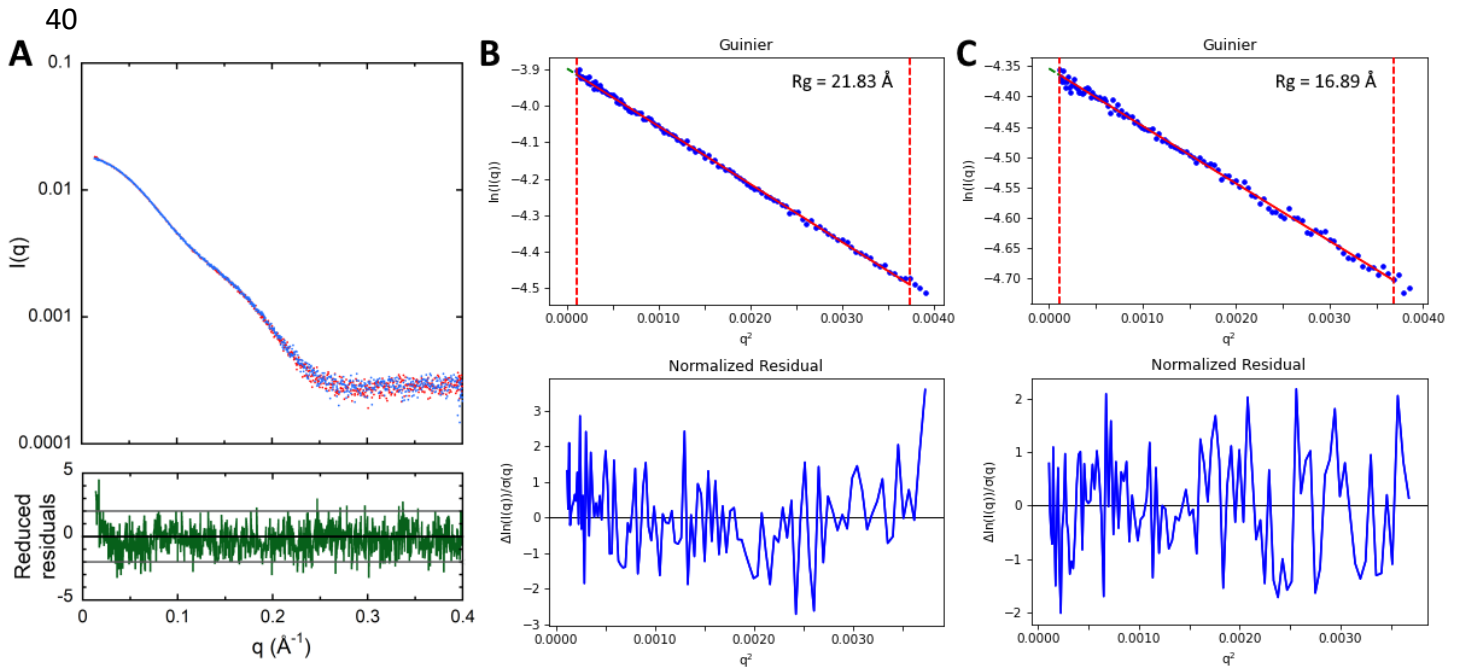

| <b>Data collection parameters</b>                                        |                                       |                                      |                                          |
|--------------------------------------------------------------------------|---------------------------------------|--------------------------------------|------------------------------------------|
| Instrument                                                               | Beamline SWING (Synchrotron SOLEIL)   |                                      |                                          |
| Detector                                                                 | EigerX4M in vacuum (Dectris)          |                                      |                                          |
| Sample to detector distance                                              | 2.00 m                                |                                      |                                          |
| Beam geometry                                                            | 400 $\mu\text{m}$ x 200 $\mu\text{m}$ |                                      |                                          |
| Wavelength ( $\text{\AA}$ )                                              | 1.033                                 |                                      |                                          |
| q-range ( $\text{\AA}^{-1}$ )                                            | 0.0041 < q < 0.50                     |                                      |                                          |
| Exposure time (ms) / reading time (ms)                                   | 990 / 10                              |                                      |                                          |
| Temperature (K)                                                          | 288                                   |                                      |                                          |
| Sample                                                                   | Holo-CaM                              | Holo-CaM<br>(prepared in 5%<br>DMSO) | Holo-CaM:CDZ<br>(prepared in 7%<br>DMSO) |
| Molar extinction coefficient<br>( $\text{M}^{-1} \cdot \text{cm}^{-1}$ ) | 2 980                                 |                                      |                                          |
| CaM molecular mass <sup>(1)</sup> (Da)                                   | 16 706                                |                                      |                                          |
| Initial CaM concentration ( $\mu\text{M}$ )                              | 500                                   | 500                                  | 333                                      |
| Initial CDZ concentration ( $\mu\text{M}$ )                              | 0                                     | 0                                    | 1050                                     |
| Running buffer of the SEC                                                | Buffer F                              |                                      |                                          |
| <b>Structural parameters</b>                                             |                                       |                                      |                                          |
| I(0) Guinier ( $\text{cm}^{-1}$ )                                        | 0.0182                                | 0.0203                               | 0.0129                                   |
| $R_g$ Guinier ( $\text{\AA}$ )                                           | 21.98 $\pm$ 0.06                      | 21.83 $\pm$ 0.03                     | 16.89 $\pm$ 0.04                         |
| I(0) P(r) ( $\text{cm}^{-1}$ )                                           | 0.183                                 | 0.0204                               | 0.0129                                   |
| $R_g$ P(r) ( $\text{\AA}$ )                                              | 22.49 $\pm$ 0.03                      | 22.39 $\pm$ 0.04                     | 16.83 $\pm$ 0.03                         |
| $D_{\text{max}}$ ( $\text{\AA}$ )                                        | 74                                    | 72                                   | 52                                       |
| <b>Data reduction and analysis software</b>                              |                                       |                                      |                                          |
| FOXTROT, ATSAS, RAW, US-SOMO, GNOM                                       |                                       |                                      |                                          |
| <b>Modeling software</b>                                                 |                                       |                                      |                                          |
| DENS, EOM                                                                |                                       |                                      |                                          |

51

52 **Table S1: SAXS data collection and scattering derived parameters.**

53

54 (1) Molecular mass of calmodulin in the absence of the N-terminal methionine residue. The  
55 expected averaged molecular mass from Protpi server (<https://www.protpi.ch/Calculator/ProteinTool>)  
56 is 16 706.25 Da. The averaged molecular mass measured by mass spectrometry is 16 706.18  $\pm$  0.07 Da  
57 ( $\Delta = 0.07$  Da, *i.e.*, 4.2 ppm).

58

59

| Complexes                      | Holo-CaM:CDZ<br>(molar ratio of 1:2.2) | Holo-CaM:CDZ<br>(molar ratio of 1:10) |
|--------------------------------|----------------------------------------|---------------------------------------|
| Beamline                       | PROXIMA-2A                             | PROXIMA-1                             |
| Wavelength                     | 0.9801                                 | 0.8266                                |
| Resolution range               | 30.91 - 1.898 (1.966 - 1.898)          | 34.08 - 2.279 (2.36 - 2.279)          |
| Space group                    | C 1 2 1                                | P 6 <sub>1</sub> 2 2                  |
| PDB ID                         | 7PSZ                                   | 7PU9                                  |
| Unit cell                      | 66.848 36.127 68.382<br>90 116.738 90  | 39.351 39.351 336.92<br>90 90 120     |
| Total reflections              | 78268 (7850)                           | 278336 (29794)                        |
| Unique reflections             | 11450 (1097)                           | 8006 (751)                            |
| Multiplicity                   | 6.8 (7.2)                              | 34.8 (39.7)                           |
| Completeness (%)               | 97.55 (96.39)                          | 99.93 (99.87)                         |
| Mean I/sigma(I)                | 17.21 (2.57)                           | 17.84 (2.71)                          |
| Wilson B-factor                | 37.33                                  | 52.14                                 |
| R-merge                        | 0.06148 (0.8184)                       | 0.1477 (1.307)                        |
| R-meas                         | 0.06686 (0.8823)                       | 0.15 (1.324)                          |
| R-pim                          | 0.02585 (0.3274)                       | 0.02589 (0.2087)                      |
| CC1/2                          | 0.998 (0.906)                          | 0.999 (0.909)                         |
| CC*                            | 1 (0.975)                              | 1 (0.976)                             |
| Reflections used in refinement | 11450 (1095)                           | 8006 (750)                            |
| Reflections used for R-free    | 583 (45)                               | 406 (25)                              |
| R-work                         | 0.2281 (0.3077)                        | 0.2341 (0.2600)                       |
| R-free                         | 0.2574 (0.3430)                        | 0.2663 (0.2775)                       |
| CC(work)                       | 0.947 (0.802)                          | 0.904 (0.862)                         |
| CC(free)                       | 0.946 (0.442)                          | 0.932 (0.902)                         |
| Number of non-hydrogen atoms   | 1281                                   | 1259                                  |
| macromolecules                 | 1149                                   | 1134                                  |
| ligands                        | 89                                     | 84                                    |
| solvent                        | 43                                     | 41                                    |
| Protein residues               | 145                                    | 144                                   |
| RMS(bonds)                     | 0.011                                  | 0.014                                 |
| RMS(angles)                    | 1.45                                   | 1.48                                  |
| Ramachandran favored (%)       | 99.30                                  | 97.89                                 |
| Ramachandran allowed (%)       | 0.70                                   | 2.11                                  |
| Ramachandran outliers (%)      | 0.00                                   | 0.00                                  |
| Rotamer outliers (%)           | 1.59                                   | 6.50                                  |
| Clashscore                     | 7.35                                   | 3.51                                  |
| Average B-factor               | 45.22                                  | 60.49                                 |
| macromolecules                 | 43.24                                  | 60.53                                 |
| ligands                        | 69.12                                  | 59.36                                 |
| solvent                        | 48.66                                  | 61.64                                 |

60  
61  
62  
63  
64

**Table S2: Crystallographic data collection and refinement statistics.**  
Statistics for the highest-resolution shell are shown in parentheses.

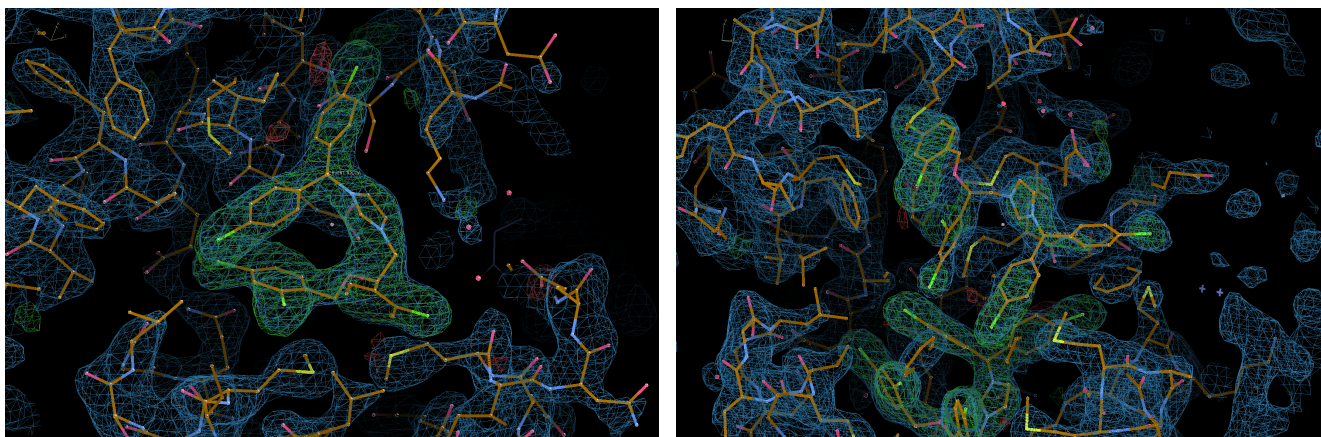

65  
66 **Figure S4: Difference electron density map.**  $2mF_o - DF_c$  and  $mF_o - Df_c$  difference electron density maps  
67 (colored in blue and green, respectively) for PDB structure 7PSZ, calculated by setting the occupancy  
68 of the CDZ molecules to zero. In both panels maps are contoured at 1.2 and  $3\sigma$  levels, respectively.  
69

70  
71

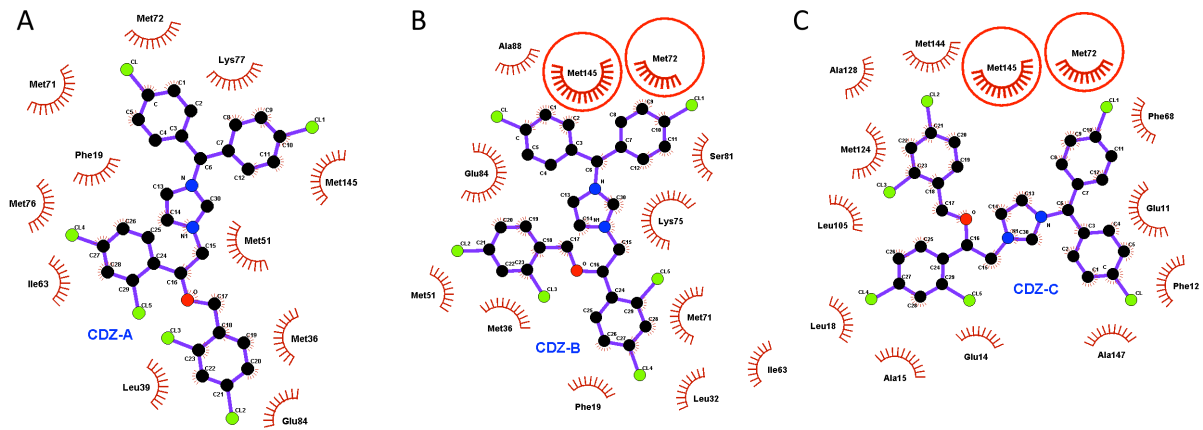

72  
73

74 **Figure S5: Interactions between CDZ and Holo-CaM residues visualized using Ligplot+. A.**  
75 Ligplot of CDZ from the crystallographic structure of the 1:1 Holo-CaM:CDZ complex (PDB ID: 7PSZ)  
76 and its interacting residues. Most of these residues are located in the C-terminal part of N-CaM and in  
77 the vicinity of the central linker (residues 77-81). **B. and C.** Ligplot of the two CDZ molecules from the  
78 Holo-CaM:CDZ 1:2 crystallographic structure (PDB ID: 7PU9). Whereas CDZ-B interacts with almost  
79 the same residues than CDZ-A mainly located in the N-terminal lobe, CDZ-C interacts with residues in  
80 both lobes. Methionine residues 72 and 145 (circled in red) interact with both CDZ molecules, as well  
81 as with CDZ-A in the 1:1 complex. The vast majority of the Holo-CaM:CDZ interactions are  
82 hydrophobic.

83



|                  | Holo-CaM:CDZ<br>1:1 | Holo-CaM:CDZ 1:2 |         | Effect in<br>HDX-MS |
|------------------|---------------------|------------------|---------|---------------------|
|                  | CDZ A               | CDZ B            | CDZ C   |                     |
| N-Lobe           |                     |                  | 11 Glu  | Grey                |
|                  |                     |                  | 12 Phe  |                     |
|                  |                     |                  | 14 Glu  |                     |
|                  |                     |                  | 15 Ala  |                     |
|                  |                     |                  | 18 Leu  |                     |
|                  |                     | 19 Phe           | 19 Phe  | Red                 |
|                  |                     |                  | 32 Leu  |                     |
|                  |                     | 36 Met           | 36 Met  |                     |
|                  |                     | 39 Leu           |         |                     |
|                  |                     | 51 Met           | 51 Met  |                     |
|                  |                     | 63 Ile           | 63 Ile  |                     |
|                  |                     |                  | 68 Phe  |                     |
|                  |                     | 71 Met           | 71 Met  |                     |
|                  | 72 Met              | 72 Met           | 72 Met  |                     |
| Linker<br>region |                     | 75 Lys           |         |                     |
|                  | 76 Met              |                  |         |                     |
|                  | 77 Lys              |                  |         |                     |
| C-Lobe           |                     | 81 Ser           |         | Red                 |
|                  | 84 Glu              | 84 Glu           |         |                     |
|                  |                     | 88 Ala           |         | Blue                |
|                  |                     |                  | 105 Leu |                     |
|                  |                     |                  | 124 Met |                     |
|                  |                     |                  | 128 Ala |                     |
|                  |                     |                  | 144 Met | Pink                |
| 145 Met          | 145 Met             | 145 Met          |         |                     |
|                  |                     | 147 Ala          |         |                     |

85  
86  
87  
88  
89  
90  
91  
92  
93  
94  
95  
96  
97

**Table S3: Detailed location of residues interacting with CDZ according to Ligplot+ and comparison with HDX-MS data.** CDZ-A is the CDZ molecule from the crystallographic structure of the 1:1 Holo-CaM:CDZ complex (PDB ID: 7PSZ, Holo-CaM:CDZ<sub>A</sub>). CDZ-B and CDZ-C are the CDZ molecules from the crystallographic structure of the 1:2 Holo-CaM:CDZ complex (PDB ID: 7PU9, Holo-CaM:CDZ<sub>BC</sub>). The effects observed by HDX-MS correspond to the average [ $\Delta$ deuteration] taken from Figures 3 and S6, the scale is from 0 % (blue) to 7.5% (white) to 15 % (red). Grey means no HDX-MS data were obtained.

- (1) The interlobe linker corresponds to residues [76-81] and the linker region to residues [74-82].

| DATASETS                                              | Holo-CaM                                               | Holo-CaM:CDZ |
|-------------------------------------------------------|--------------------------------------------------------|--------------|
| HDX reaction details                                  |                                                        |              |
| - <i>pD</i> :                                         | 7.4                                                    | 7.4          |
| - <i>T°C</i> :                                        | RT                                                     | RT           |
| - <i>Deuterium level</i>                              |                                                        |              |
| • <i>during labelling</i>                             | 80%                                                    | 80%          |
| • <i>after quench</i>                                 | 26.7%                                                  | 26.7%        |
| - <i>Calcium</i> :                                    | 2 mM                                                   | 2 mM         |
| - <i>DMSO</i> :                                       | 2%                                                     | 2%           |
| - <i>CDZ molar excess</i> <sup>(1)</sup> :            | /                                                      | 32x          |
| - <i>% complex during labelling</i> <sup>(2)</sup> :  | /                                                      | 90           |
| HDX time course analyzed (min)                        |                                                        |              |
|                                                       | 0.16, 0.33, 0.5, 1, 10, 30, and 120 min                |              |
| Number of peptides                                    | 40                                                     | 40           |
| Sequence coverage                                     | 93.2%                                                  | 93.2%        |
| Average peptide length                                | 13.3                                                   | 13.3         |
| Redundancy                                            | 3.85                                                   | 3.85         |
| Average peptide length / Redundancy ratio             | 3.45                                                   | 3.45         |
| Replicates <sup>(3)</sup>                             | 3                                                      | 3            |
| Repeatability (pooled SD, Da) <sup>(4)</sup>          | 0.06                                                   | 0.06         |
| Significance difference between states <sup>(5)</sup> | Wald test, $p < 0.05$ ; biological threshold set to 3% |              |

99

100 **S4: HDX-MS data summary.**

101

102 (1) Molar excess used in labelling

103 (2)  $K_D = 3 \mu\text{M}$ ; binding stoichiometry Holo-CaM:CDZ =1:1.2

104 (3) Independent technical replicates

105 (4) One unique charge state is used per peptide

106 (5) MEMHDX software (<https://memhdx.c3bi.pasteur.fr/>)

107

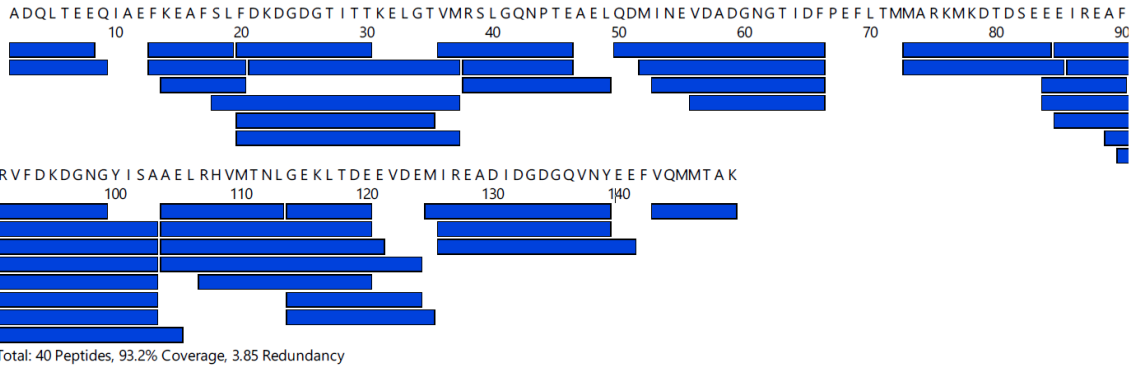

108  
 109  
 110  
 111  
 112  
 113

**Figure S6: Peptide map of CaM by HDX-MS.** Peptide map of CaM generated after 2 min pepsin digestion at 20°C and pH 2.5. Each blue bar corresponds to a unique peptide. A total of 40 peptides covering 93.2% of the protein sequence with a 3.85 redundancy value were selected for HDX-MS.

114

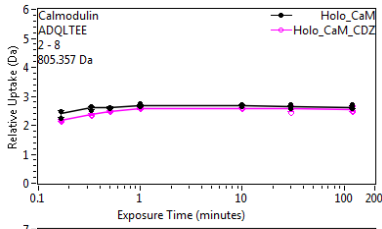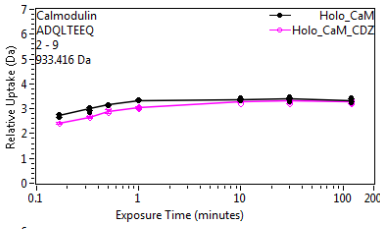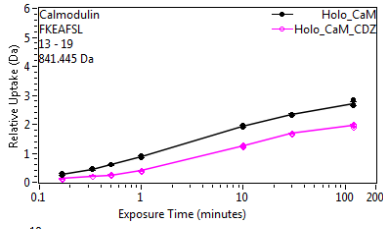

115

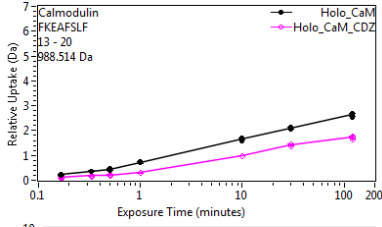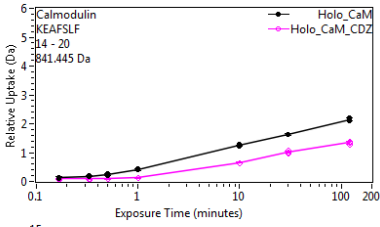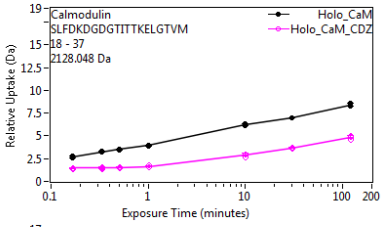

116

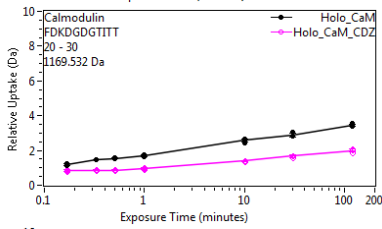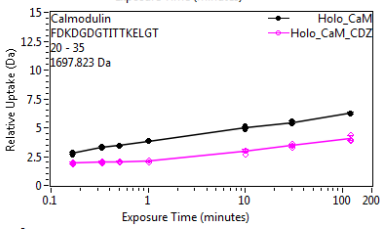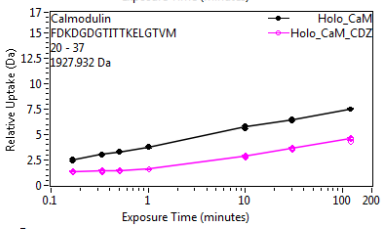

117

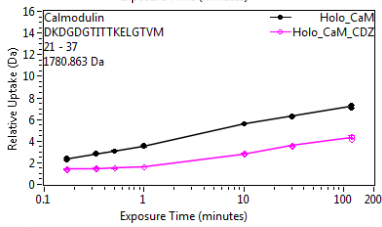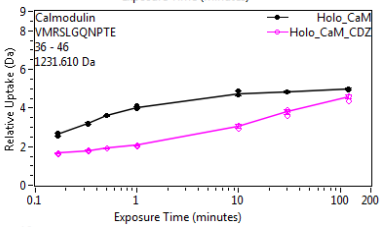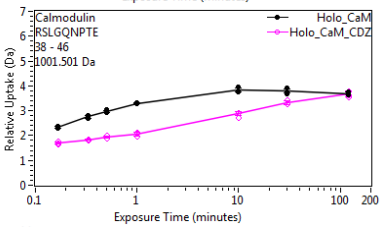

118

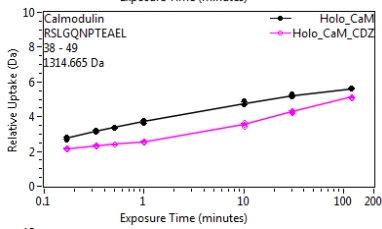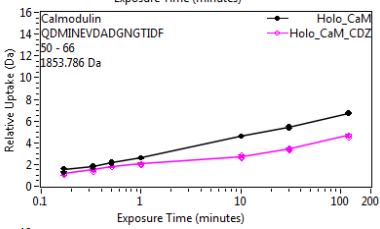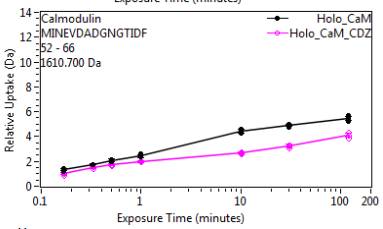

119

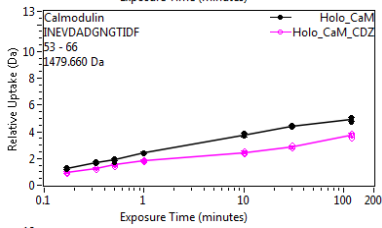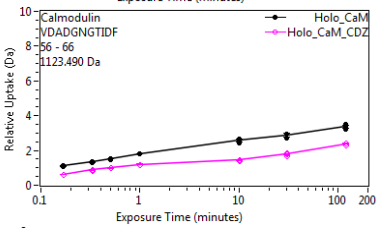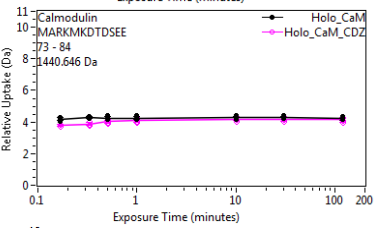

120

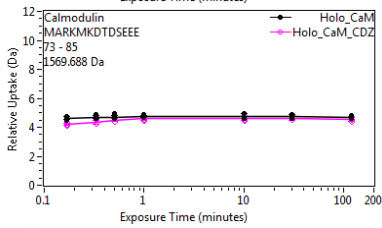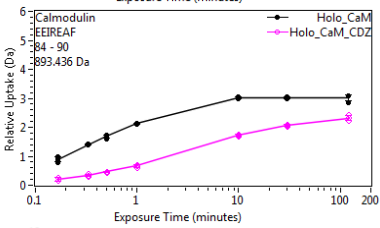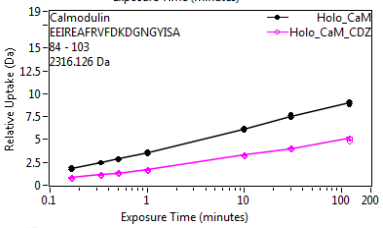

121

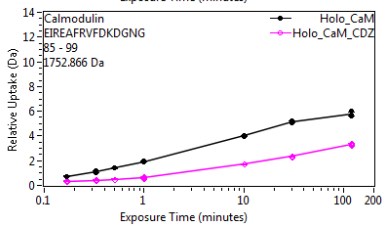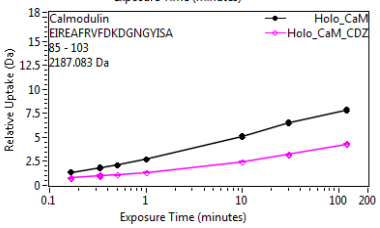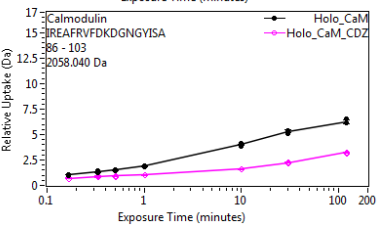

122

123

124

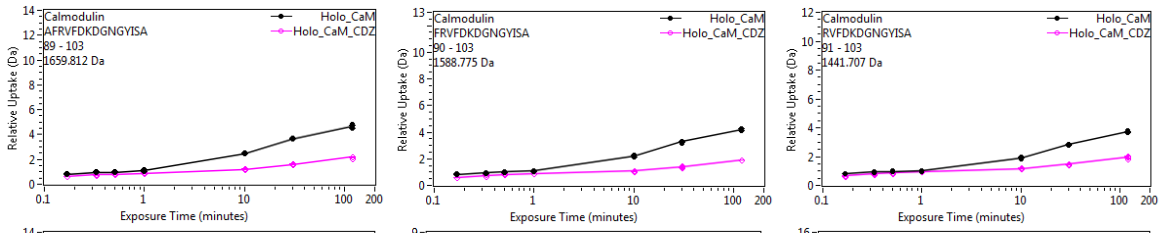

125

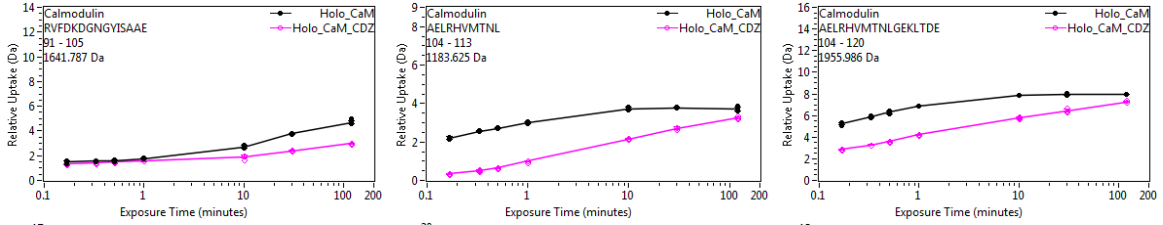

126

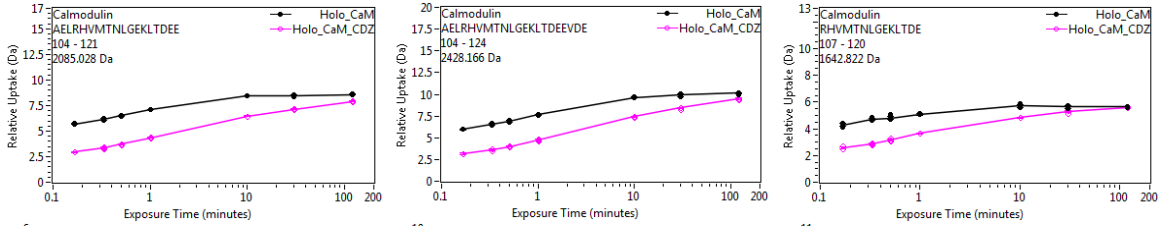

127

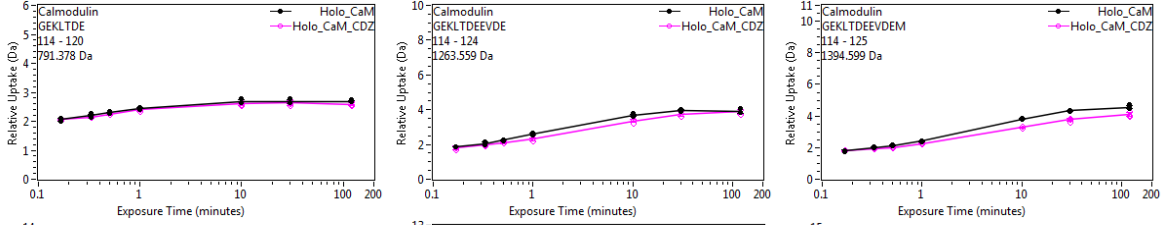

128

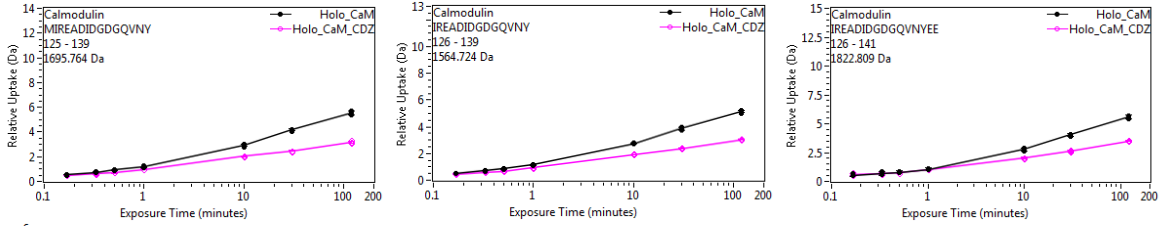

129

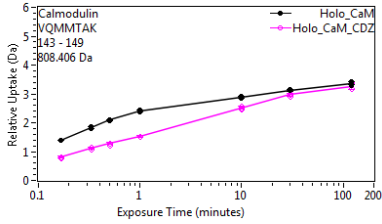

130

131

132

133

Figure S7: Deuterium uptake plots for each individual CaM peptides across all conditions.

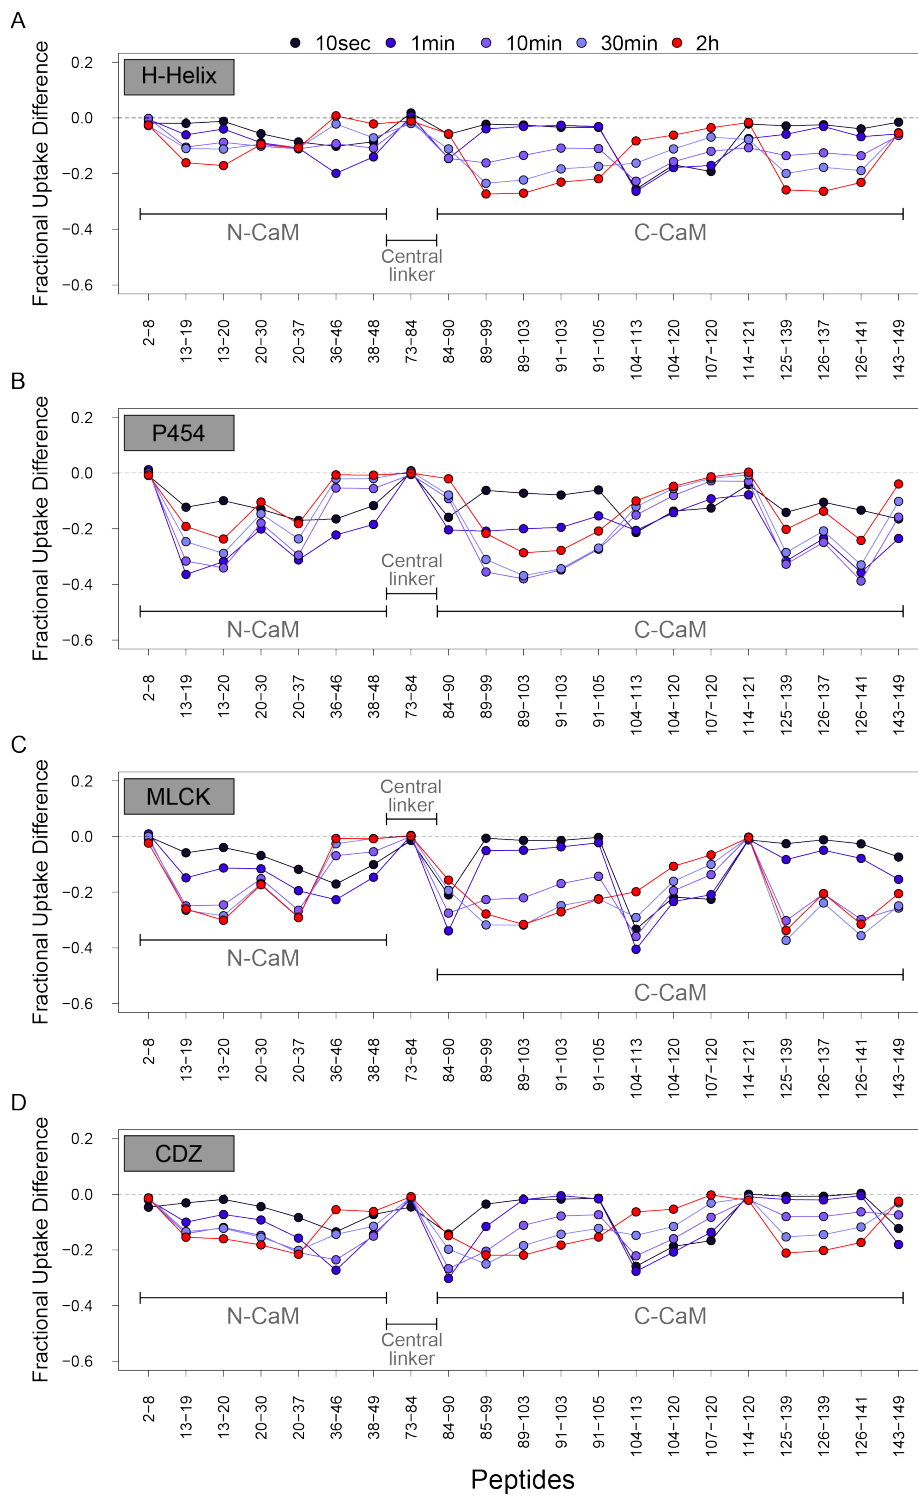

134  
 135  
 136  
 137  
 138  
 139  
 140  
 141  
 142

**Figure S8: Comparison of the differential HDX patterns within Holo-CaM upon H-helix (A), P454 (B), MLCK (C) and CDZ (D) binding.** Each differential fractional uptake plot shows the differences in uptake calculated between the CDZ-bound and the free Holo-CaM states at each time point, and for each selected peptide. A negative uptake difference value indicates a ligand-induced protective effect (i.e., reduction in solvent accessibility).

| <b>Holo-CaM:CDZ ratio</b> | <b><math>\tau_c</math> (ns) <sup>(1)</sup></b> |
|---------------------------|------------------------------------------------|
| 1:0.0                     | $4.5 \pm 0.2$                                  |
| 1:0.5                     | $4.7 \pm 0.2$                                  |
| 1:1.0                     | $5.2 \pm 0.3$                                  |
| 1:2.0                     | $5.4 \pm 0.4$                                  |
| 1:2.7                     | $5.7 \pm 0.1$                                  |

143  
144

145 **Table S5: Rotational correlation time ( $\tau_c$ ) of Holo-CaM at different Holo-CaM:CDZ ratios.** For a  
146 protein of a given molecular weight,  $\tau_c$  is expected to be longer for compact conformations relative to  
147 compact domains joined by a flexible linker as is the case of Holo-CaM. The  $\tau_c$  value increases at a 1:1  
148 Holo-CaM:CDZ ratio ( $5.2 \pm 0.3$  ns) relative to Holo-CaM ( $4.5 \pm 0.2$  ns) and is effectively the same at a  
149 1:2 ratio ( $5.4 \pm 0.4$  ns). Of note, at 0.5 CDZ equivalents, the  $\tau_c$  ( $4.7 \pm 0.2$  ns) corresponds within  
150 experimental error to the mean of the free and CDZ-bound protein tumbling times ( $4.85 \pm 0.5$  ns),  
151 suggesting that free and CDZ-bound (1:1 ratio) forms of Holo-CaM coexist at equivalent concentrations.  
152

153 (1)  $\tau_c$  values ( $\pm$  errors) were obtained as described in the Materials and Methods section using the  
154 TRACT sequence, which gives tumbling correlation times that are not affected by possible contributions  
155 of chemical exchange (between the bound and free forms of a protein or internal conformational  
156 exchange) and chemical shift anisotropy.  
157

|                     | Holo-CaM      |            | Holo-CaM : CDZ (1:1) |            | Holo-CaM : CDZ (1:2) |            |
|---------------------|---------------|------------|----------------------|------------|----------------------|------------|
|                     | NMR Structure | NMR Shifts | X-Ray                | NMR Shifts | X-Ray                | NMR Shifts |
| Residues in Helix   | 82            | 84         | 85                   | 86         | 85                   | 86         |
| Residues in Strands | 4             | 10         | 4                    | 12         | 8                    | 12         |
| Helix (%)           | 55            | 57         | 57                   | 58         | 57                   | 58         |
| Strand (%)          | 3             | 7          | 3                    | 8          | 5                    | 8          |

158  
159  
160  
161  
162  
163  
164  
165

**Table S6: Comparison of secondary structure content from SRCD, NMR and X-ray.** NMR structure of apo-CaM is a consensus of 25 NMR structures (PDB ID: 1CFC). NMR structure of Holo-CaM is a consensus of three structures of each lobe (PDB ID: 1J7O). NMR and X-ray structures of Holo-CaM with CDZ correspond to the data presented in this paper (PDB ID: 7PSZ, Holo-CaM:CDZ<sub>A</sub> 1:1 and PDB ID: 7PU9, Holo-CaM:CDZ<sub>BC</sub> 1:2).



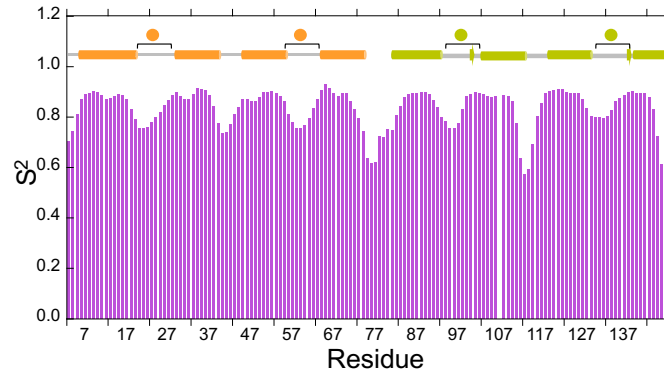

167  
 168  
 169  
 170  
 171  
 172  
 173  
 174  
 175  
 176

**Figure S9. Order parameter ( $S^2$ ) reflecting the amplitude of motions on the ns-ps time scales of free Holo-CaM.** The secondary structure (helix=cylinder, strand=arrow) and calcium ion loops (spheres and square brackets) are schematized on the top of each graph, with the N- and C-lobes colored in orange and green, respectively. Backbone amide  $S^2$  values were calculated from backbone chemical shifts using RCI. The order parameter, which varies from 0 to 1, reflects the amplitude of internal motions of the backbone NH bonds on the ns-ps time scale (0: unrestricted motions; 1: no internal motions). The N and C-termini, calcium binding loops, the loop between helices H6 and H7 and the interlobe linker region (highlighted in grey) show fast high amplitude motions.

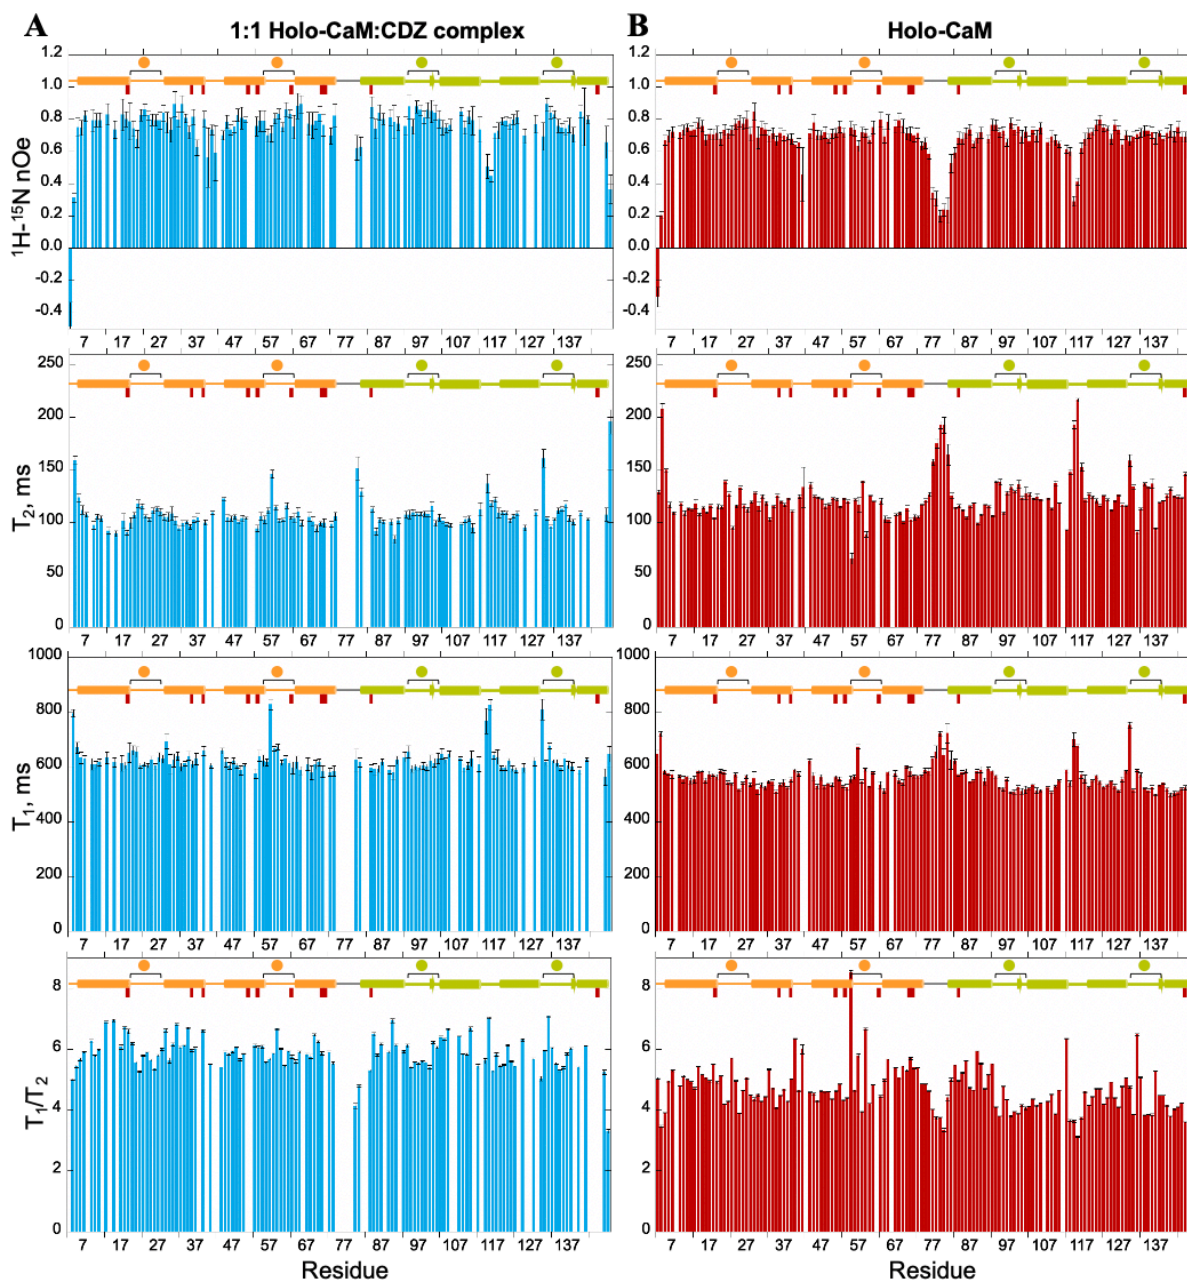

177  
 178 **Figure S10: Holo-CaM internal dynamics from  $^{15}\text{N}$  relaxation data.**  $T_1$ ,  $T_2$   $T_1/T_2$  and  $^1\text{H}$ - $^{15}\text{N}$  nOe of  
 179 Holo-CaM in a 1:1 complex with CDZ (A) and isolated (B), as a function of the residue number. Data  
 180 were collected at 37 °C on a 600 MHz spectrometer. The secondary structure (helix=cylinder,  
 181 strand=arrow) and calcium ion loops (spheres and square brackets) are schematized on the top of each  
 182 graph, with the N- and C-lobes colored in orange and green, respectively. Lacking data are due to either  
 183 proline residues, signal overlap and unassigned (shifted very weak or absent exchanged-broadened  
 184 signals). The positions of contacting residues in the X-Ray 1:1 Holo-CaM:CDZ complex structure, as  
 185 defined by Ligplot+ are represented by wine rectangles. In Holo-CaM, the relaxation parameters (high  
 186  $T_2$ , low  $T_1$ , low  $T_1/T_2$  and low  $^1\text{H}$ - $^{15}\text{N}$  nOes) of residues in the linker region (77-81) and flanking residues  
 187 in  $\alpha$ -helices H4 and H6 are characteristic of high amplitude motions on the ns-ps time scale, with an  
 188 increased flexibility around its mid-point (79T-80D). In contrast, the relaxation parameters of the  $\alpha$ -  
 189 helical elements of the N- and C-lobes are indicative of ordered regions in a globular protein. The N-  
 190 (residues 3-4) and C-terminal (146-148) residues are disordered and loops between helices H2-H3 (39-  
 191 42) and 6-7 (110-118) show increased mobility with respect to the other residues in both lobes' calcium  
 192 binding EF-hands, as assessed by high  $T_2$  and low  $^1\text{H}$ - $^{15}\text{N}$  nOe values. Finally, residues 55V and 59G in  
 193  $\text{Ca}^{2+}$  binding loop 2, as well as residues 132G and 137N in  $\text{Ca}^{2+}$  binding loop 4, display low  $T_2$  values  
 194 revealing conformational exchange phenomena on the ms- $\mu\text{s}$  time scale. Error bars were obtained from  
 195 1000 Monte Carlo simulations considering one noise standard deviation.  
 196

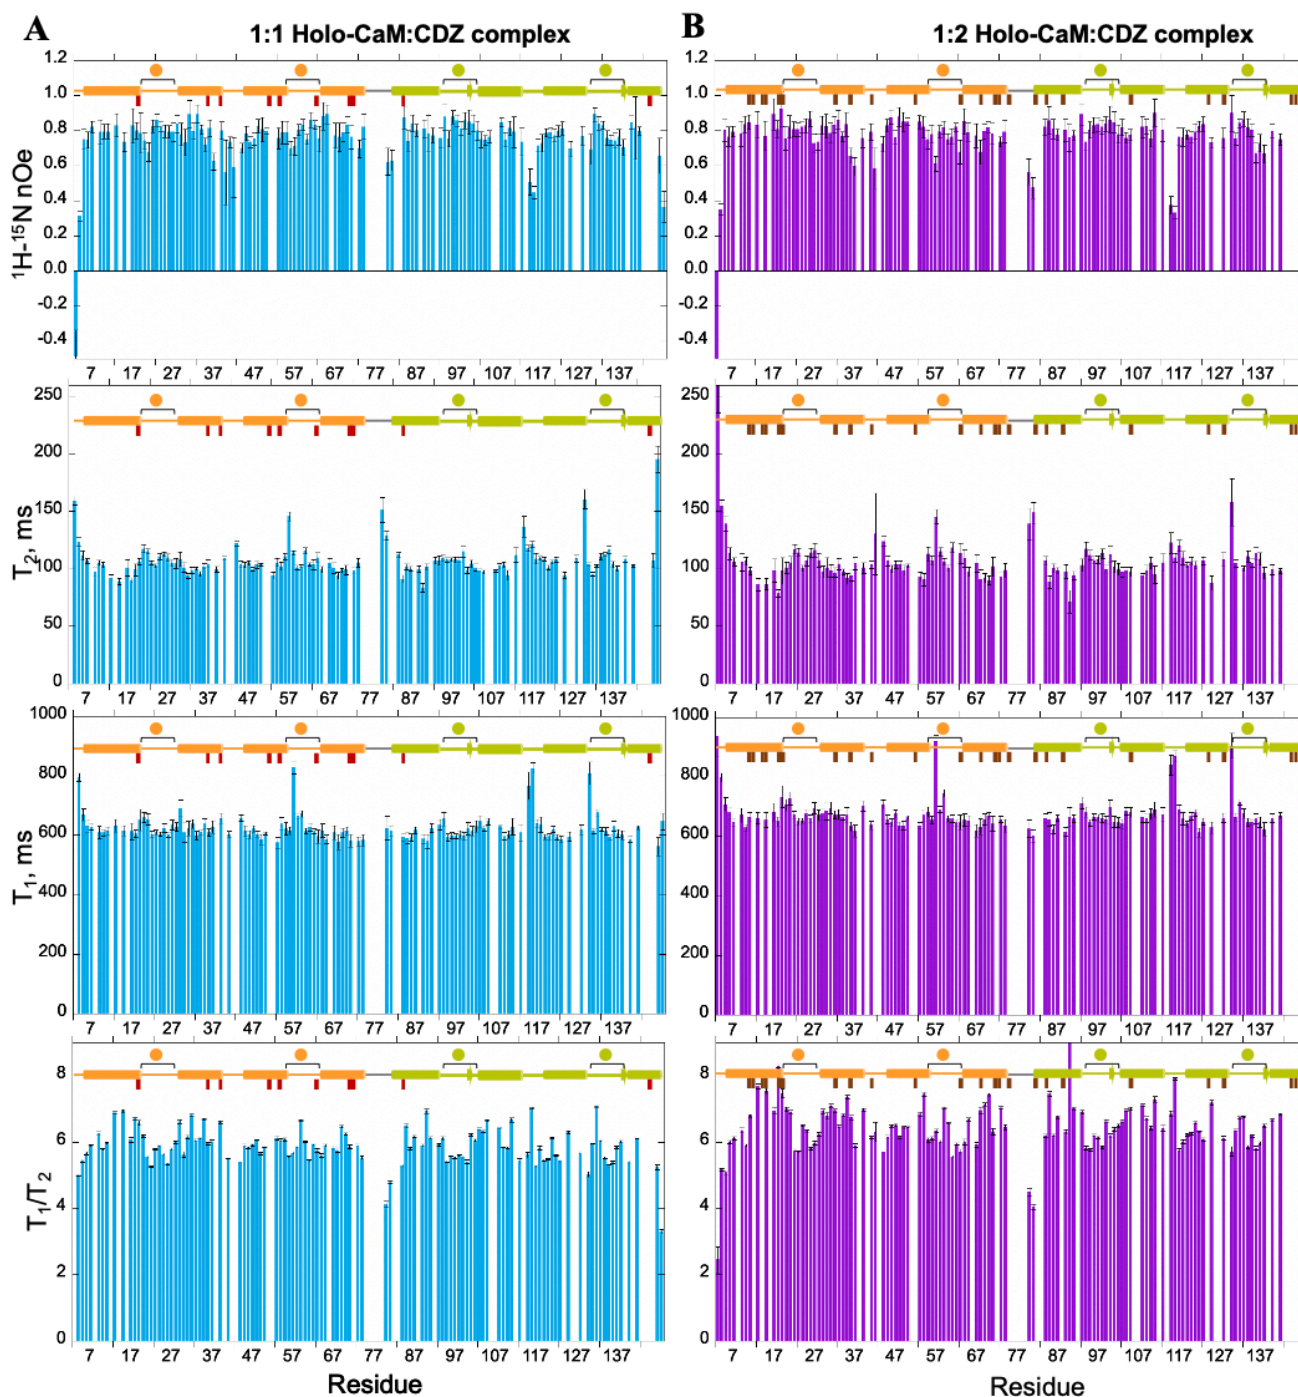

197  
 198 **Figure S11: Comparison of Holo-CaM internal dynamics from  $^{15}\text{N}$  relaxation data in complex**  
 199 **with CDZ.**  $T_1$ ,  $T_2$   $T_1/T_2$  and  $^1\text{H}$ - $^{15}\text{N}$  nOe of Holo-CaM in complex with 1 **A.** or 2 **B.** CDZ molecules as  
 200 a function of the residue number. The  $T_1/T_2$  ratios, which in the absence of contributions from  
 201 conformational exchange and for residues in rigid structures (nOe  $\geq 0.65$ ), are directly related to the  
 202 tumbling correlation time of a molecule. Data were collected at 37 °C on a 600 MHz spectrometer. Data  
 203 for the 1:2 complex was obtained with a 3-fold excess of CDZ relative to Holo-CaM. The secondary  
 204 structure (helix=cylinder, strand=arrow) and calcium ion loops (spheres and square brackets) are  
 205 schematized on the top of each graph, with the N- and C-lobes colored in orange and green, respectively.  
 206 Lacking data are due to either proline residues, signal overlap and unassigned (very weak shifted or  
 207 absent exchanged-broadened signals). The positions of contacting residues in the X-Ray 1:2 Holo-  
 208 CaM:CDZ complex structure, as defined by Ligplot+ are represented by wine (1:1 complex) and maroon  
 209 (1:2 complex) rectangles. Error bars were obtained from 1000 Monte Carlo simulations considering one  
 210 noise standard deviation. The nOe,  $T_1$  and  $T_2$  profiles are very similar in 1 or 2 CDZ-loaded Holo-CaM,  
 211 albeit some residues showing shorter/longer  $T_2$  values indicative of different conformational exchange  
 212 rates and slightly higher  $T_1$  values for the 1:3 sample, most likely due to the higher molecular weight of  
 213 the complex.

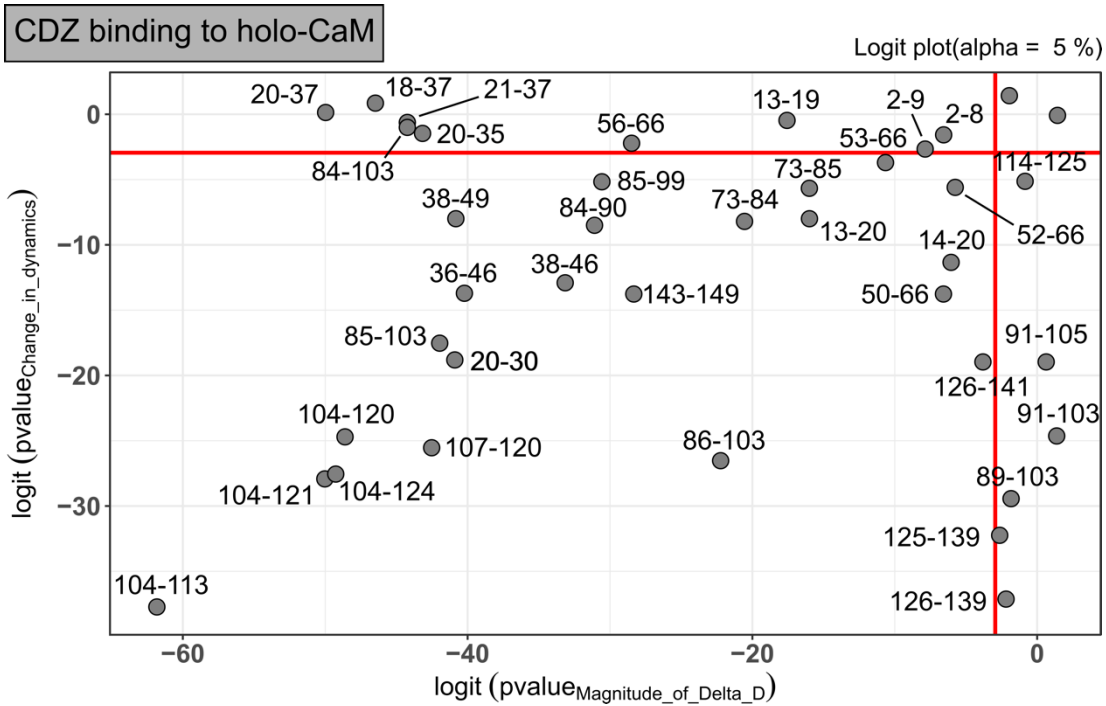

215

216

217

218

219

220

221

222

223

**Figure S12: Statistical analysis performed with MEMHDX.** Logit plot showing the statistical results obtained with all individual CaM peptides in the presence of a 32x molar excess CDZ. The two red lines correspond to the statistically significant threshold used during the statistical analysis (FDR sets to 5%, Wald test, biological threshold sets to 2%). Peptides showing no statistically significant uptake differences between states are displayed on the top right-hand rectangle created by the two red lines. Statistically significant peptides are labelled.
